# Supplementary material
Source: publisher figshare collection journal article supplement (https://gsajournals.figshare.com/ndownloader/files/27194078)
Supplement: Supplementary file 1 [file 27194078]

**Supplementary information**


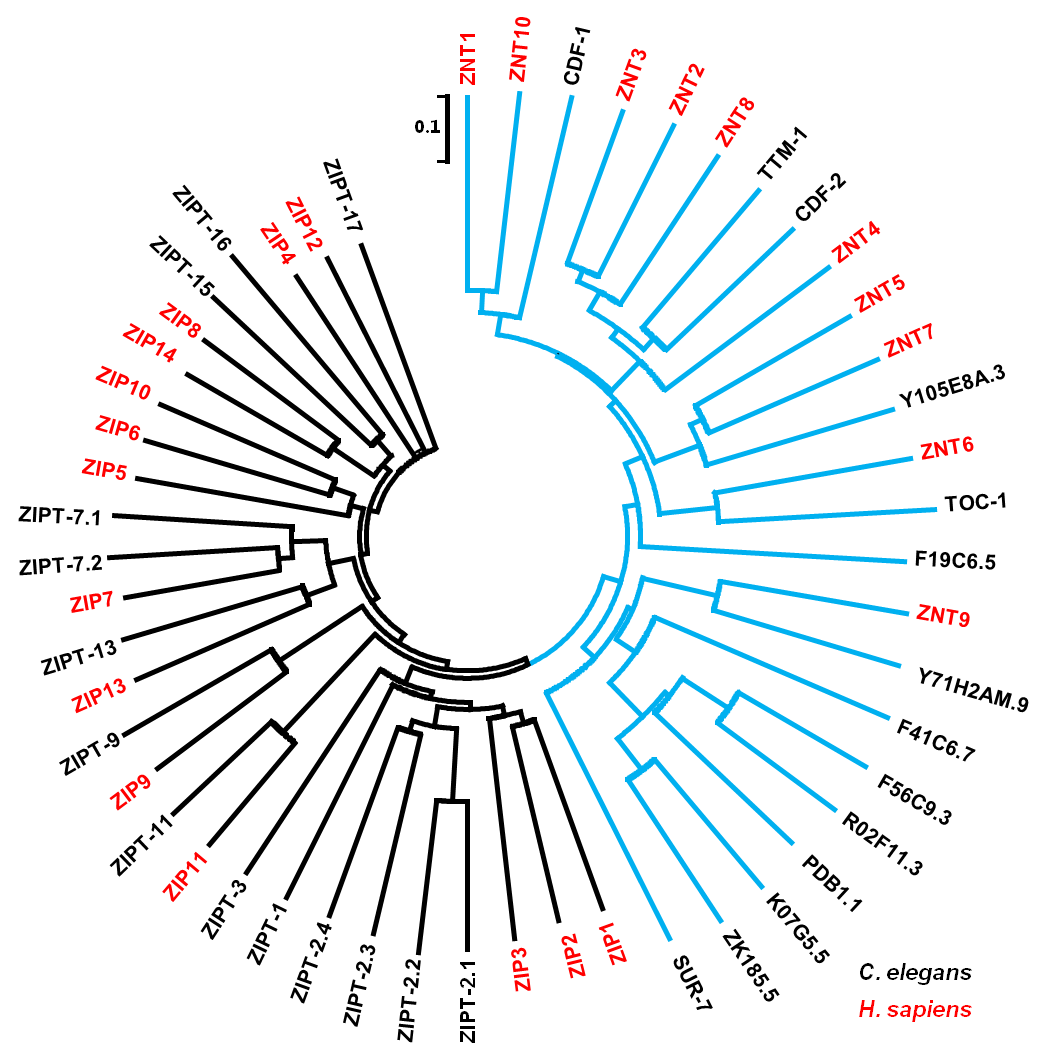


**Figure S1** Zinc transport relevant proteins cladogram. A dendrogram shows zinc transport relevant proteins from *Caenorhabditis elegans* (28 members, black typeface) and *Homo sapiens* (red typeface), including CDFs family (blue line) and ZIPs family (black line).


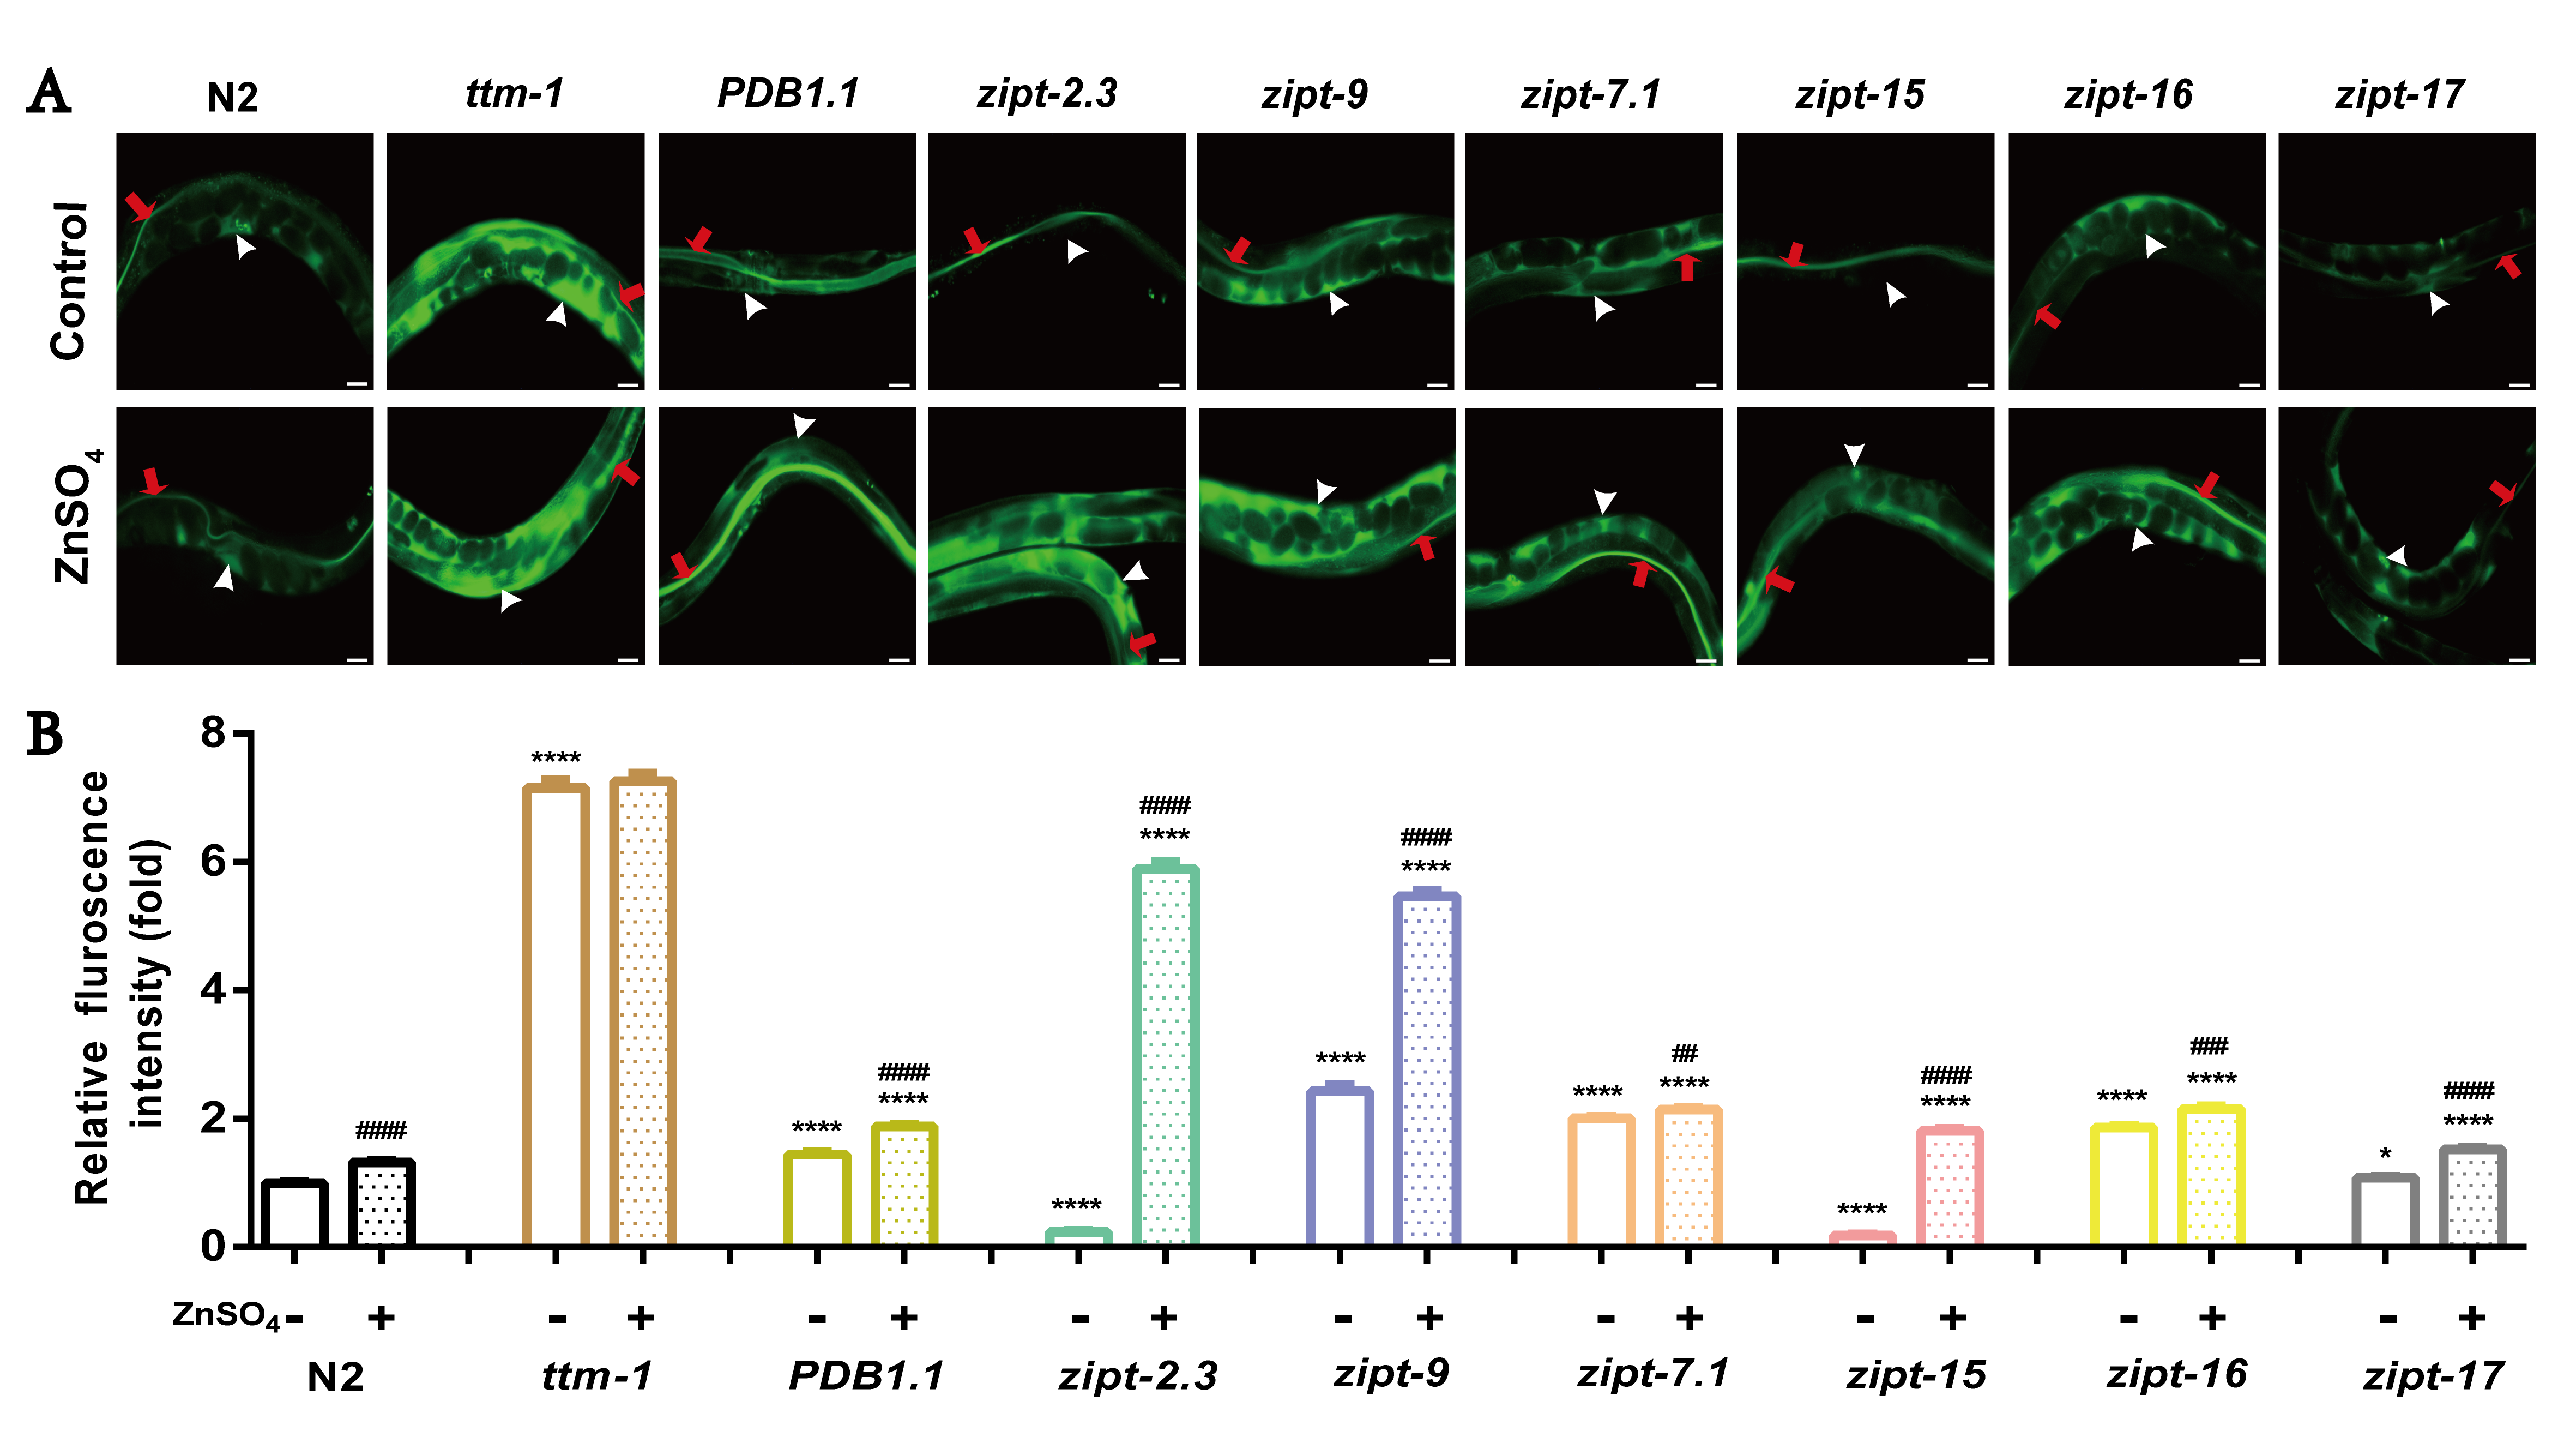


**Figure S2** Other zinc related transporter mutants with zinc content. (A) Fluorescence microscopy of live worms of N2 (WT), *ttm-1(tm6669)*, *PDB1.1(ok3114)*, *zipt-2.3(ok2094)*, *zipt-9(ok876)*, *zipt-7.1(ok971)*, *zipt-15(ok2160)*, *zipt-16(ok875)* and *zipt-17(ok745)*, stained with zinpyr-1 and captured using identical settings and exposure times. Scale bar represents 25 μm. The concentration of ZnSO4 is 50 μM. The red arrowheads indicate the lumen zinc accumulates of the intestine, the white arrows show pseudocoelomic zinc. (B) Quantitation of the fluorescence intensity of pseudocoelomic zinc.


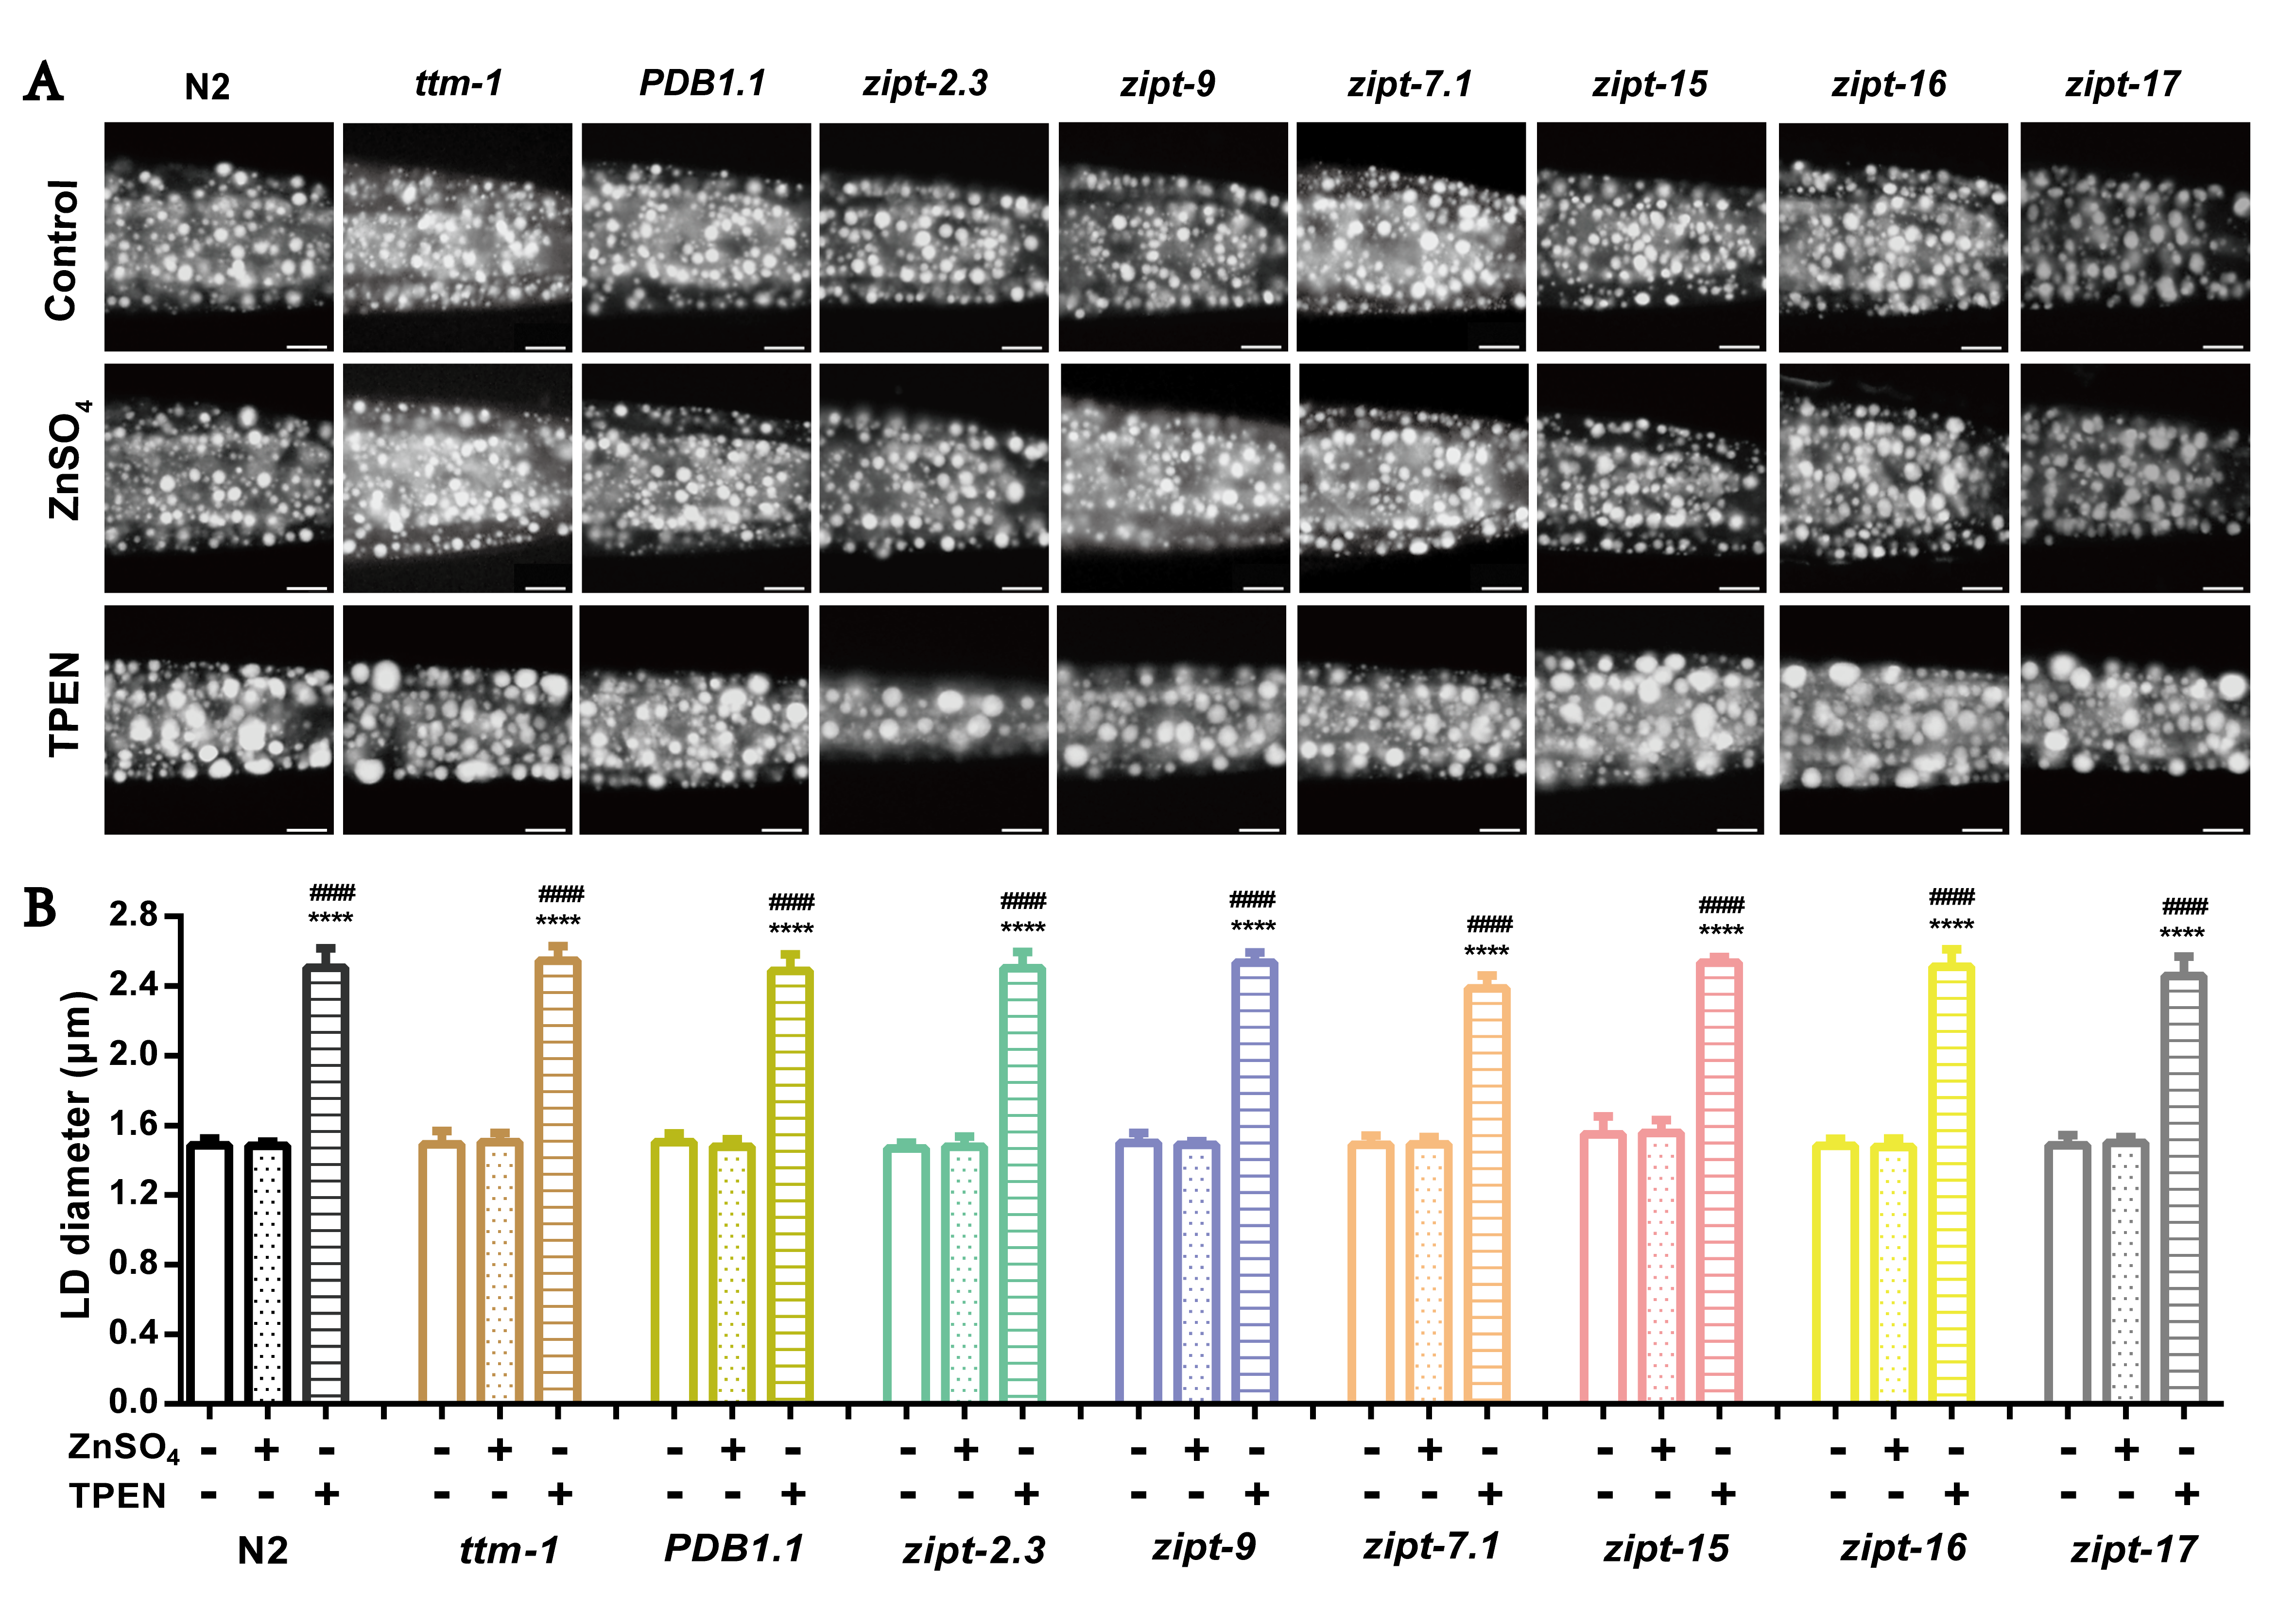


**Figure S3** The fat content of other zinc related transporter mutants in specific zinc conditions.(A) Nile red staining of fixed worms of N2(WT), *ttm-1(tm6669)*, *PDB1.1(ok3114)*, *zipt-2.3(ok2094)*, *zipt-9(ok876)*, *zipt-7.1(ok971)*, *zipt-15(ok2160)*, *zipt-16(ok875)* and *zipt-17(ok745)* under control, ZnSO4, and TPEN treatment. For representative animals, the anterior was on the left and the posterior was on the right, Bar, 10 µm. (B) Quantitation of lipid droplet size in the posterior region of intestines from five worms of each worm strain.


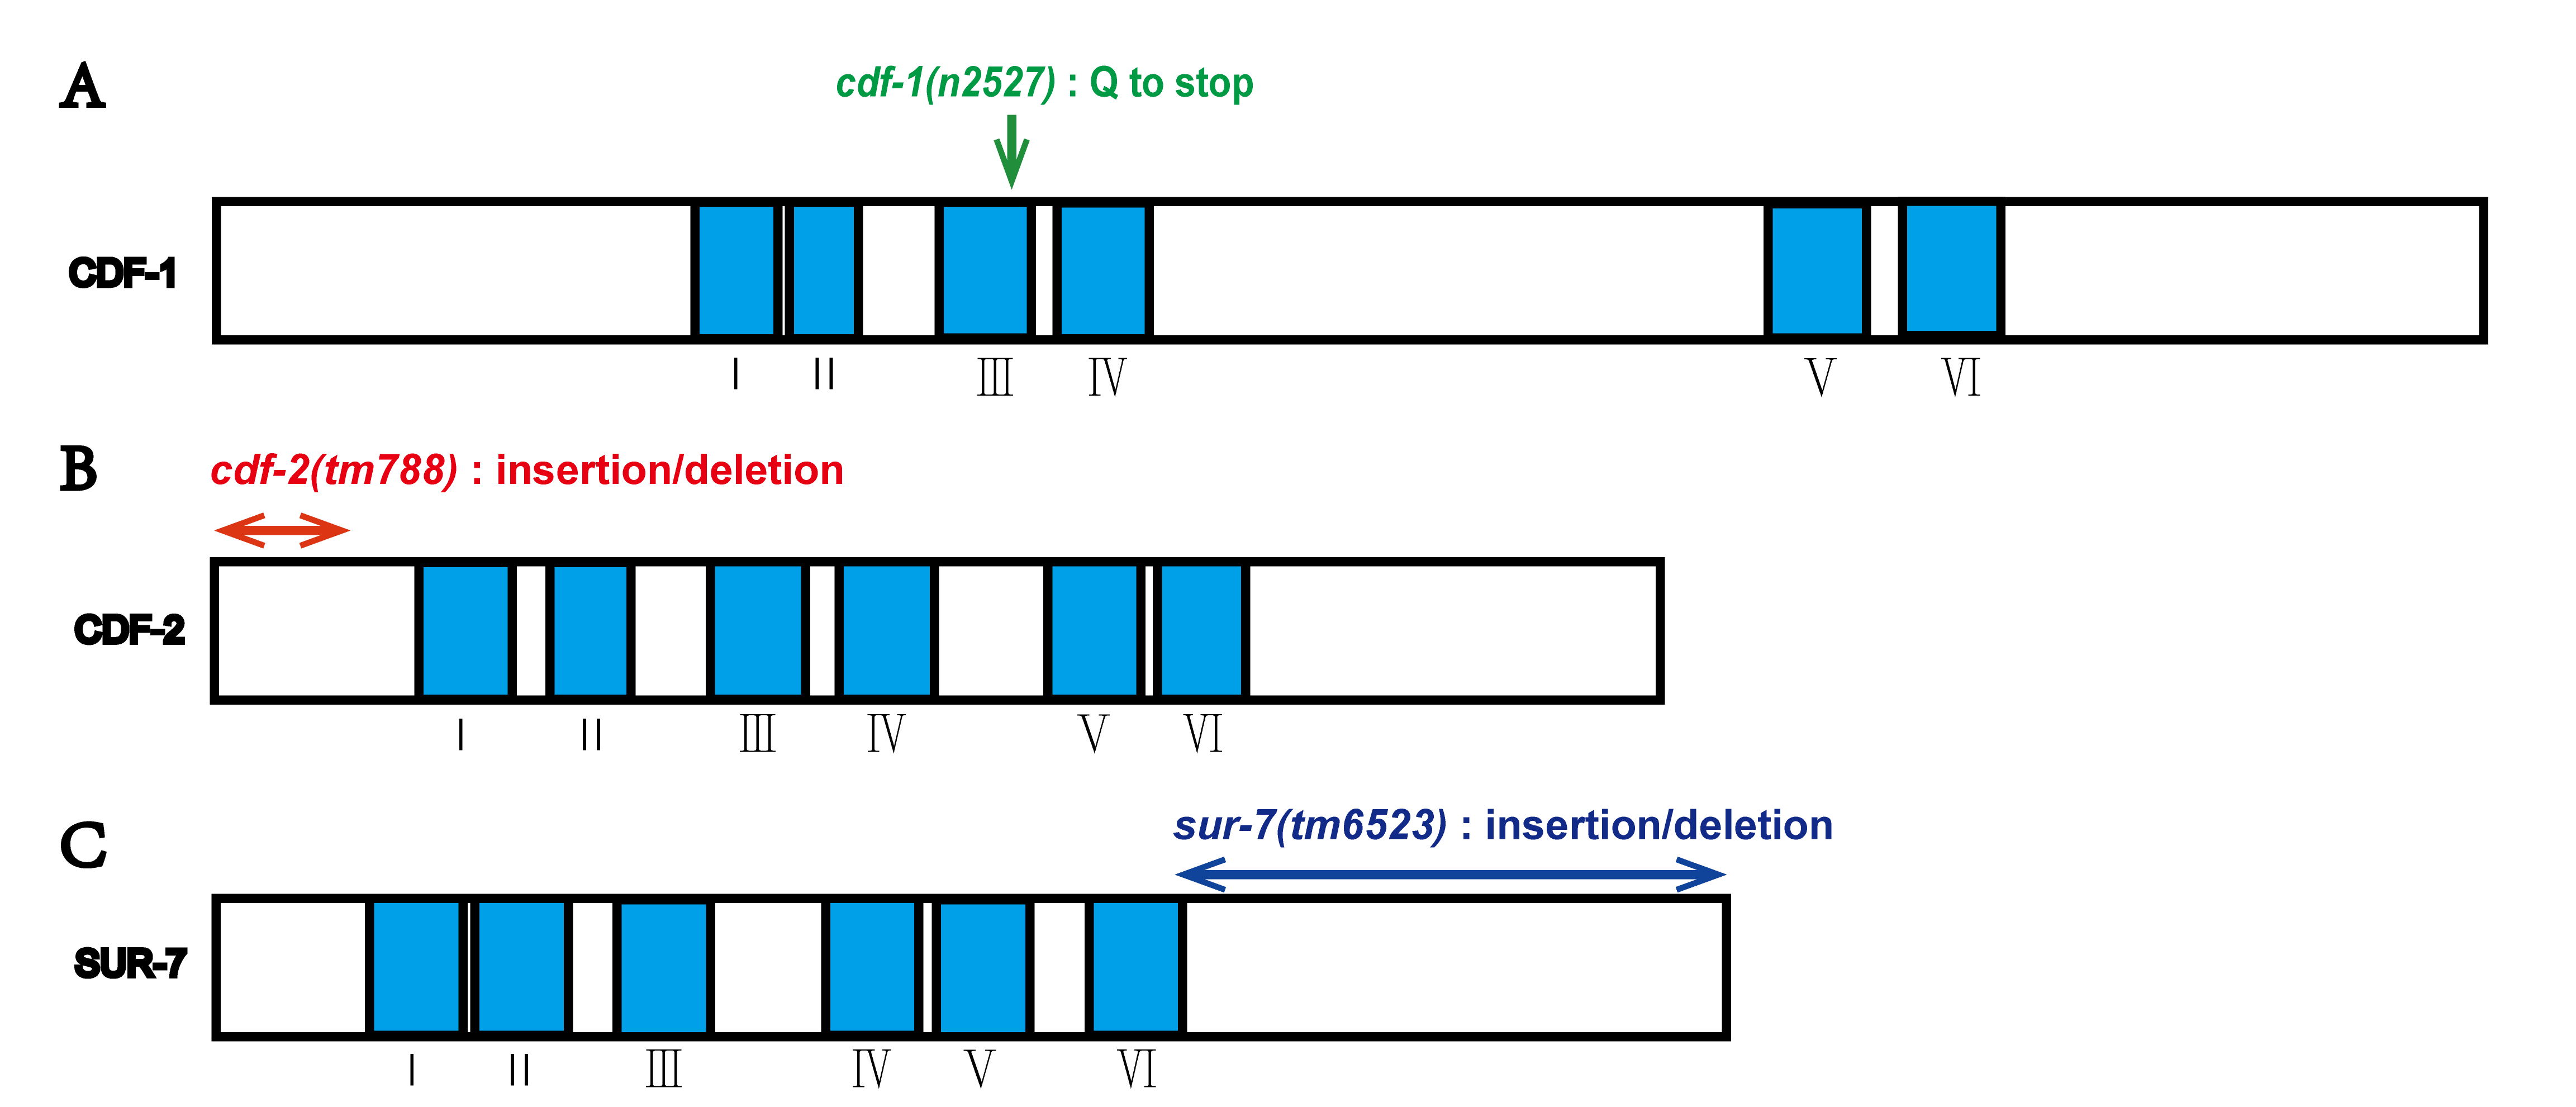


**Figure S4** The structure of (A) CDF-1, (B) CDF-2, and (C) SUR-7 protein domains.The blue rectangles indicate the predicted six transmembrane motifs (labeled I–VI). (A) The green arrow indicates the stop codon replaced amino acids Q of *cdf-1(n2527)* mutant. (B) The double red sided arrow indicates the insertion/deletion region, which cause frame shift mutation of *cdf-2(tm788)*. (C) The double blue sided arrow indicates the insertion/deletion region, which cause early termination of translation of *sur-7(tm6523)* mutant.


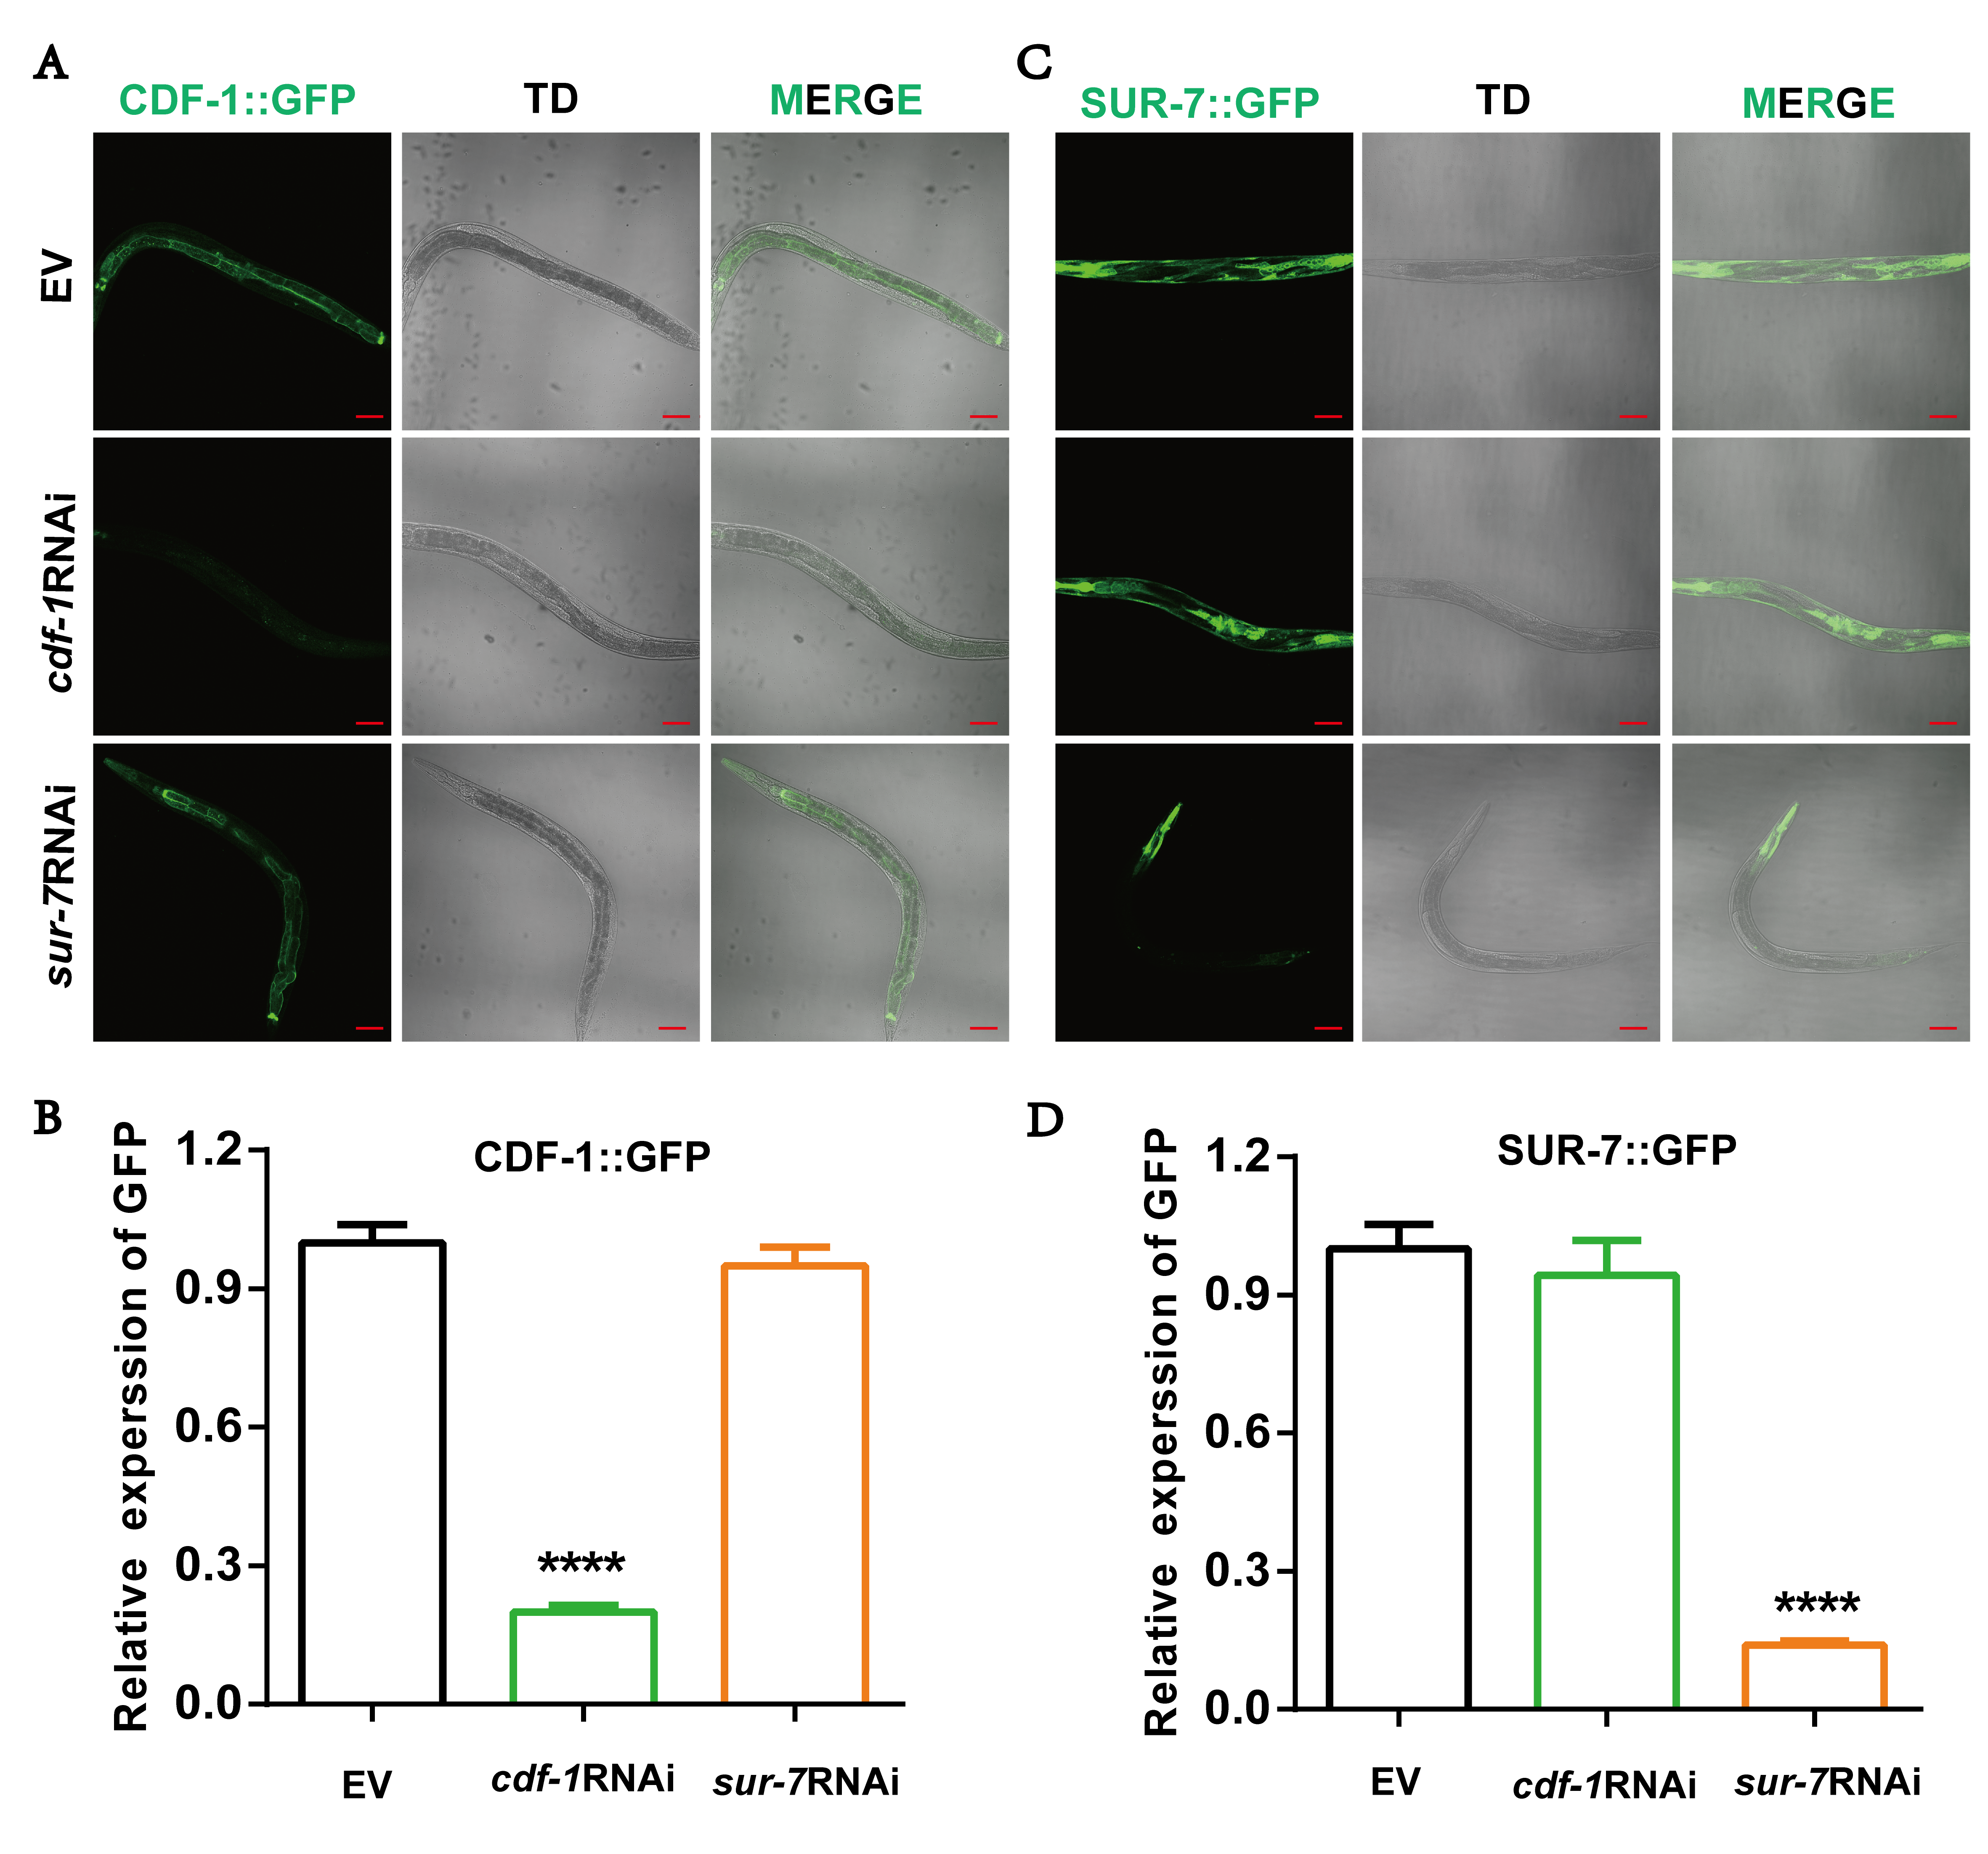


**Figure S5** Validation of RNAi efficiency and specification. (A) Fluorescence intensity of CDF-1::GFP under empty vector EV, *cdf-1*RNAi, and *sur-7RNAi*. Bar, 100 μm. (B) Quantization of fluorescence intensity of CDF-1::GFP. (C) Fluorescence intensity of SUR-7::GFP under empty vector EV, *cdf-1*RNAi, and *sur-7RNAi*. Bar, 100 μm. (D) Quantization of fluorescence intensity of SUR-7::GFP.


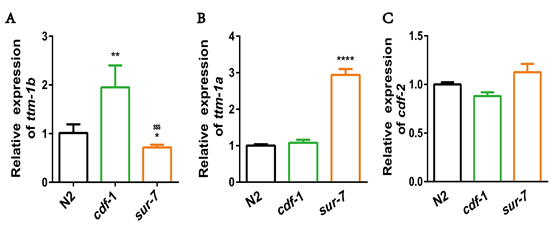


**Figure S6** The expression of *ttm-1b*, *ttm-1a*, and *cdf-2* mRNA levels in *cdf-1* and *sur-7* mutant worms. For the statistical analysis, significant difference between N2 andeach worm strain: *P < 0.05, **P < 0.01, ****P < 0.0001. Significant difference between *cdf-1* and *sur-7* mutants: $$$P < 0.001.


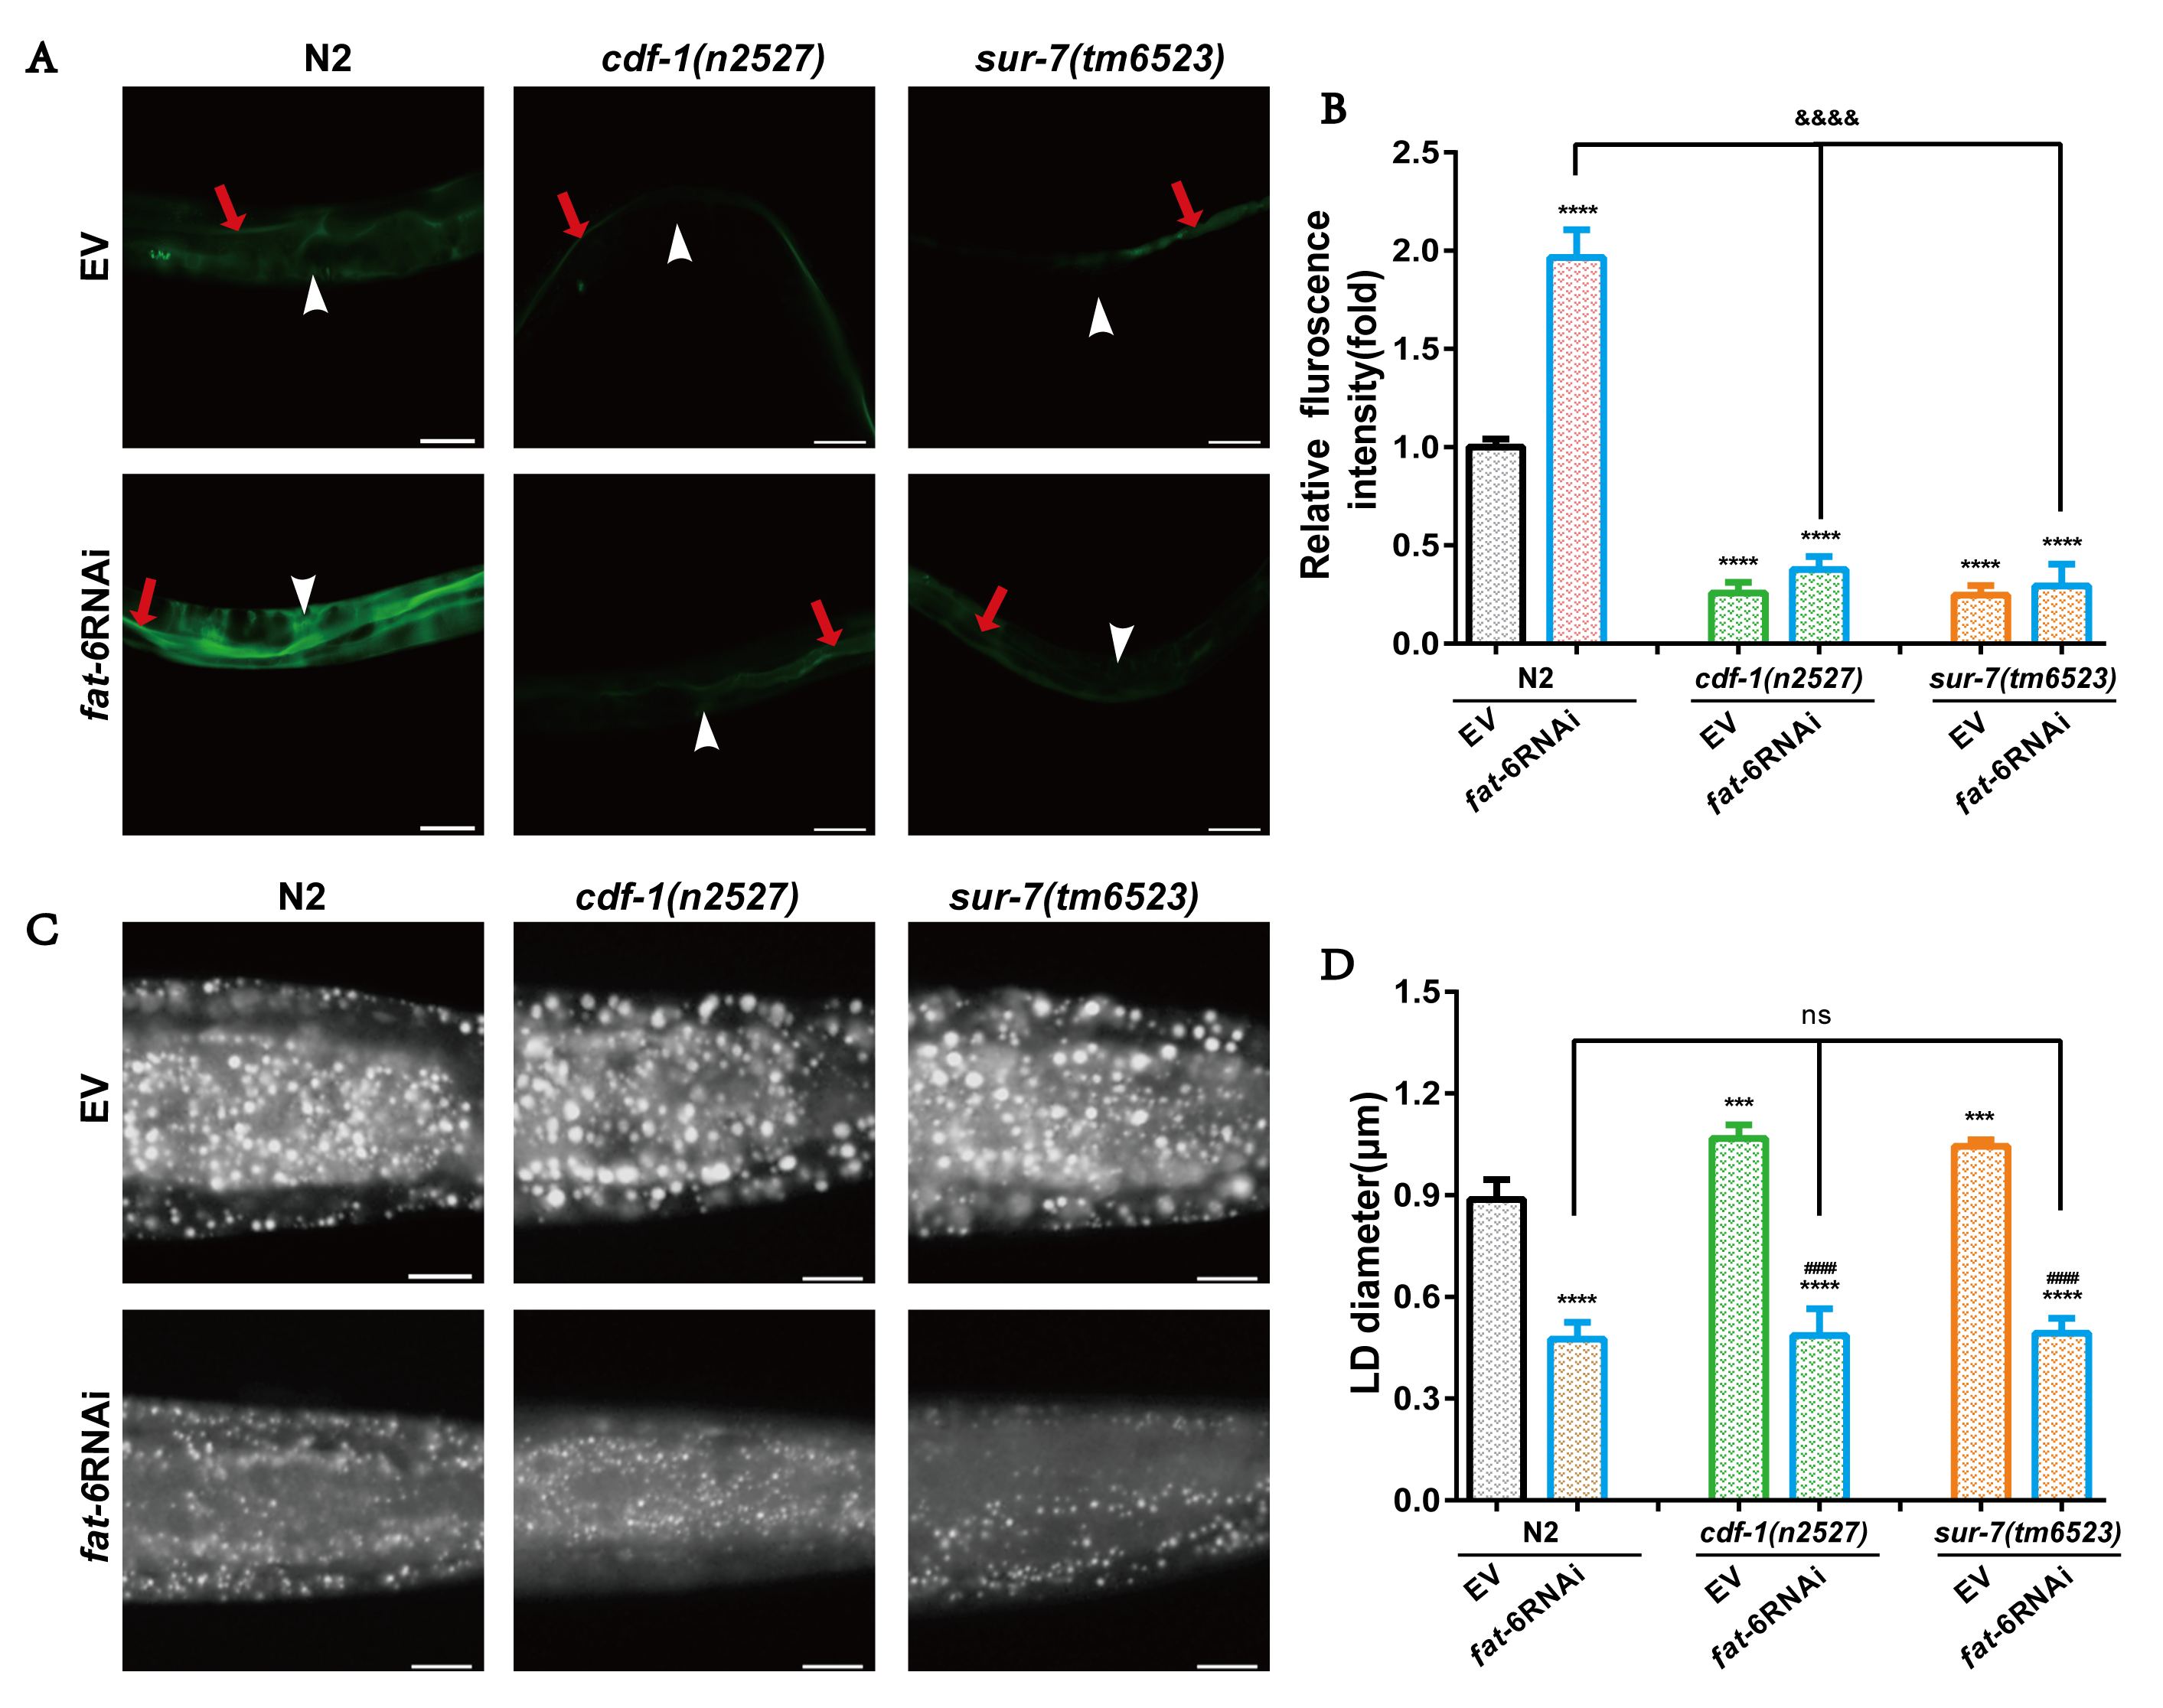


**Figure S7**. The zinc level and fat accumulation in loss of function SCD and CDF-1 /SUR-7. (A) Fluorescence microscopy of live worms of WT N2, *cdf-1(n2527)*, and *sur-7(tm6523)* in empty vector EV and *fat-6*RNAi, stained with Zinpyr-1 and captured using identical settings and exposure times. Scale bar represents 50 μm. The red arrowheads indicate the lumen zinc, the white arrows show pseudocoelomic zinc. (B) Quantitation of the fluorescence intensity about pseudocoelomic zinc from (A). (C) Nile red staining of fixed worms. For representative animals, the anterior was on the left and the posterior was on the right, Bar, 50 µm. (D) Quantitation of lipid droplet size in the posterior region of intestines from five worms of each worm strain. The data are presented as mean ± SEM. For all statistical analysis, significant difference between empty vector EV and each of other worm strains: ***P < 0.001, ****P < 0.0001(unpaired t-test). Significant difference within each group: ####P < 0.0001. Significant difference between *fat-6*RNAi and mutants in *fat-6*RNAi: &&&&P < 0.0001 (unpaired t-test).

**Table S1** Information of worm strains used in this study

| **Strains** | **Genotype** | **Source** | **classification** |
| --- | --- | --- | --- |
| **Zinc Transporter mutants** | | | |
| WU209 | *cdf-1(n2527)* X | NBRP | ZnT |
| FX00788 | *cdf-2(tm788)* X | NBRP | ZnT |
| FX06523 | *sur-7(tm6523)* X | NBRP | ZnT |
| FX06669 | *ttm-1(tm6669)* III | NBRP | ZnT |
| RB2291 | *PDB1.1(ok3114)* X | CGC | ZnT |
| RB971 | *zipt-16(ok875)* V | CGC | ZIP |
| RB892 | *zipt-17(ok745)* IV | CGC | ZIP |
| VC739 | *zipt -7.1(ok971)* IV | CGC | ZIP |
| RB972 | *zipt-9(ok876)* V | CGC | ZIP |
| RB1684 | *zipt-2.3(ok2094)* II | CGC | ZIP |
| VC1884 | *zipt-15(ok2160)* IV | CGC | ZIP |
| **Transgenic strains** | | | |
| LIB1174 | *unc-119(ed3);kunIs161[fat-5p::fat-5::gfp+unc-119(+)]* | BL |  |
| LIB1460 | *WT;kunEx203[cdf-1p::cdf-1::gfp, myo-2p::mcherry]* | BL |  |
| LIB1044 | *WT;kunEx187[sur-7p::sur-7::gfp, rol-6(su1006)]* | BL |  |
| BX115 | *lin-15(n765);waEx16[fat-6::gfp;lin-15(+)]* | Watts,J.L.lab |  |
| BX113 | *lin-15(n765);waEx15[fat-7::gfp;lin-15(+)]* | Watts,J.L.lab |  |
| **Other mutants** | | | |
| N2 | N2 (wild type, WT) | CGC |  |
| CE541 | *sbp-1(ep79)* III | CGC |  |
| LIB1004 | *sbp-1(ep79)* III*;cdf-1(n2527)* X | BL |  |
| LIB1006 | *sbp-1(ep79)* III*;cdf-2(tm788)* X | BL |  |
| LIB888 | *sbp-1(ep79)* III*;sur-7(tm6523)* X | BL |  |

Note: CGC indicates Caenorhabditis Genetics Center, NBRP indicates National Bioresource Project.

**Table S**2 Primers

| **Name** | **Sequence(5’→3’)** |
| --- | --- |
| RNAi F | AGCTTATCGATACCGTCGAC |
| RNAi R | TGGATCCACTAGTTCTAGAG |
| *sur-7*RNAiF | ctctagaactagtggatccaATGAGTTCGAACAAGAACAATA |
| *sur-7*RNAiR | gtcgacggtatcgataagctAACGTCTCCAGTACTTTTCGG |
| c-pPD95.75F | GAGGACCCTTGGAGGGTACC |
| c-pPD95.75R | ATCCTCTAGAGTCGACCTGC |
| Pcdf-1F | gcaggtcgactctagaggatACTAAACGTAAACGTGAGCC |
| Pcdf-1R | ggtaccctccaagggtcctcTTCGGTGATTTCATTTTCAG |
| Psur-7F | gcaggtcgactctagaggatCAGAAATTCTTATCCAGTCG |
| Psur-7R | ggtaccctccaagggtcctcAACGTCTCCAGTACTTTTCG |

Note: Lowercase [of base](javascript:;) [sequence](javascript:;) is the linker of primers.
